# Supplementary material for: EphA2-mediatedM1-like polarization of microglia attenuatesglioblastoma metastasis
Source: Research Square preprint supplement (doi:10.21203/rs.3.rs-86074/v1), 2020-10-08
Supplement: Supplementary file 1 [file 130442f934fbd2a8acbca7bc.docx]

Figure S1. (A)Western blot showing shRNA-knockdown efficiencyEphA2 in BV2 cells. β-actin was a loading control.(B)Quantitative analysis ofshRNA-knockdown efficiencyEphA2 in BV2 cells.

Figure S2 (A) Western blot showing Honokiol-inhibition efficiency PI3K-AKT in BV2 cells. β-actin was a loading control. (B) Western blot showing sc-79-activiation efficiency PI3K-AKT in BV2 cells. β-actin was a loading control.
